# Supplementary material for: Heteroatom-doped hierarchically porous thick bulk carbon derived from a Pleurotus eryngii/lignin composite: a free-standing and high mass loading electrode for high-energy-density storage
Source: Royal Society of Chemistry journal article supplement (doi:10.1039/d3gc05124b), 2024-01-01
Supplement: d3gc05124b1.pdf [file d3gc05124b1.pdf]

# Heteroatom-doped hierarchically porous thick bulk carbon derived from pleurotus eryngii/lignin composite: a free-standing and high mass loading electrode for high-energy-density storage

Weisheng Yang<sup>a</sup>, Danning Wang<sup>a</sup>, Shu Feng<sup>a</sup>, Shuijian He<sup>a</sup>, Huining Xiao<sup>b</sup>, Hongqi Dai<sup>c</sup>, Jingquan Han<sup>a\*</sup>

<sup>a</sup> Jiangsu Co-innovation Center for Efficient Processing and Utilization of Forestry Resources, College of Materials Science and Engineering, Nanjing Forestry University, Nanjing, Jiangsu, 210037, China.

<sup>b</sup> Chemical Engineering Department, New Brunswick University, Fredericton, New Brunswick, E3B 5A3, Canada.

<sup>c</sup> College of Light Industry and Food Engineering, Nanjing Forestry University, Nanjing, Jiangsu, 210037, China.

**\* Corresponding authors:**

Jingquan Han (Email: [hjq@njfu.edu.cn](mailto:hjq@njfu.edu.cn))

## S1 Characterization

The electrical conductivity of bulk carbon samples was measured using Four-Point Probes (4Probes Tech Ltd., RTS-9). The microstructure of bulk carbon samples was observed by field-emission scanning electron microscopy (FESEM, Zeiss Sigma 300) and transmission electron microscopy (TEM, JEM-2010EX). The surface wettability of bulk carbon samples was analyzed by a contact angle analyzer (OCA 15EC, Dataphysics, Germany). The volume of droplets for determination was set to 4  $\mu\text{L}$ .

Raman spectra of bulk carbon samples were collected from a Raman spectrometer (Renishaw, inVia) ranging from 500-3000  $\text{cm}^{-1}$  at an excitation wavelength of 532 nm. Bulk carbon samples were ground into powder for X-ray diffraction (XRD), Fourier Transform Infrared Spectroscopy (FT-IR), Brunauer Emmett Teller (BET) and X-ray photoelectron spectroscopy (XPS) analyses. XRD spectra were acquired using a Bruker D8 advance diffractometer operating with Cu K $\alpha$  radiation, in the range of 5-80° at a scanning rate of 10°/min. The FTIR spectra (800–3800  $\text{cm}^{-1}$ ) were recorded on a Thermo scientific Nicoletis20 FTIR spectrometer with pure KBr as the background. The specific surface area and pore size distribution of samples were determined by N<sub>2</sub> adsorption-desorption using an ASAP2460 aperture analyzer. Prior to measurement, the samples underwent degassing at 180°C for 8 hours. The surface area was then calculated using the Brunauer-Emmett-Teller (BET) equation, and a plot of the pore size distribution was obtained from the adsorption branch of the isotherm using a non-local density functional theory (NLDFT) model. The chemical composition of carbon samples was analyzed by XPS (Thermo Scientific, K-Alpha) with a mono-chromicized Al K $\alpha$  X-ray at 225 W.

## **S2 Electrochemical measurements**

The electrochemical performance (Cyclic voltammetry (CV), Galvanostatic charge-discharge (GCD), electrochemical impedance spectroscopy (EIS)) of C-PE and C-PE-LS electrodes was evaluated by a three-electrode system using an electrochemical workstation (CHI 760e, CH Instruments, China). Briefly, the C-PE or C-PE-LS served as working electrodes, while the Pt foil and Ag/AgCl electrode served as the counter

and reference electrode in 1 M H<sub>2</sub>SO<sub>4</sub> solution electrolyte. EIS was conducted at open circuit potential with an amplitude of 10 mV in a frequency range from 0.01 Hz to 100 kHz. The SSC device was assembled with two C-PE-LS electrodes using glass fiber filter as separator. The specific capacitance (*C<sub>m</sub>*, F/g), areal capacitance (*C<sub>s</sub>*, F/cm<sup>2</sup>) and volume-specific capacitance (*C<sub>v</sub>*, F/cm<sup>3</sup>) of single electrodes and devices were calculated according to discharge curves using the following equations:

$$C_m = \frac{I \times dt}{m \times dv} \quad (1)$$

$$C_s = \frac{I \times dt}{s \times dv} \quad (2)$$

$$C_v = \frac{C_s}{d} \quad (3)$$

where *I* (A) was the current, *dv* was the operation voltage (*V<sub>max</sub>* - *IR<sub>drop</sub>*), *m* (g) was the mass of the individual electrode, *S* (cm<sup>2</sup>) was the geometric area of the electrode, *d* (cm) was the thickness of electrode and *dt* (s) was the discharging time. For the devices, *A* was the geometric area of the electrode (cm<sup>2</sup>).

The areal energy density (*E*, mWh/cm<sup>2</sup>) and power density (*P*, mW/cm<sup>2</sup>) of the symmetric device were calculated using the following equations:

$$E_s = \frac{C_s \times dv^2}{2 \times 3.6} \quad (4)$$

$$P_s = \frac{3600 \times E_s}{t} \quad (5)$$

where *C<sub>s</sub>* was the areal capacitance (F/cm<sup>2</sup>), *dv* was the working voltage (V) and *t* was the discharging time (s) measured in the galvanostatic curves.

### S3 DFT calculation methods

First-principles [1,2] were employed to perform spin-polarization density functional theory (DFT) calculations within the generalized gradient approximation (GGA) using the Perdew-Burke-Ernzerhof (PBE) [3] formulation. Projected augmented wave (PAW) potentials [4,5] were chosen to describe the ionic cores, and valence electrons were taken into account using a plane wave basis set with a kinetic energy cutoff of 450 eV. The Gaussian smearing method with a width of 0.05 eV was used to allow for partial occupancies of the Kohn-Sham orbitals. Self-consistency of the electronic energy was achieved when the energy change was less than  $10^{-5}$  eV. Convergence of the geometry optimization was achieved when the energy change was less than 0.02 eV  $\text{\AA}^{-1}$ . To eliminate artificial interactions between periodic images, a 18  $\text{\AA}$  vacuum layer was added to the surface. The DFT+D3 method with empirical correction in Grimme's scheme [6, 7] was used to describe the weak interaction.

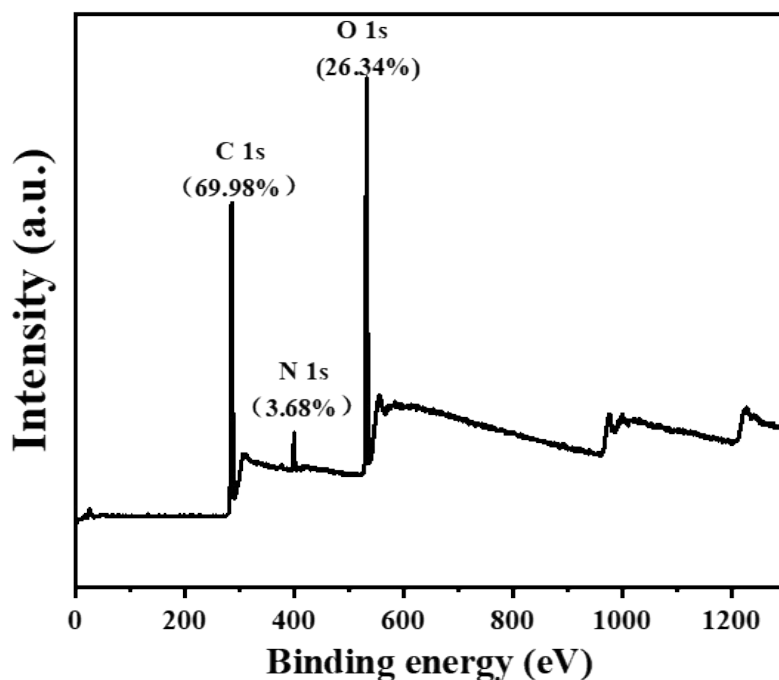

Figure S1 XPS analysis of PE aerogel.

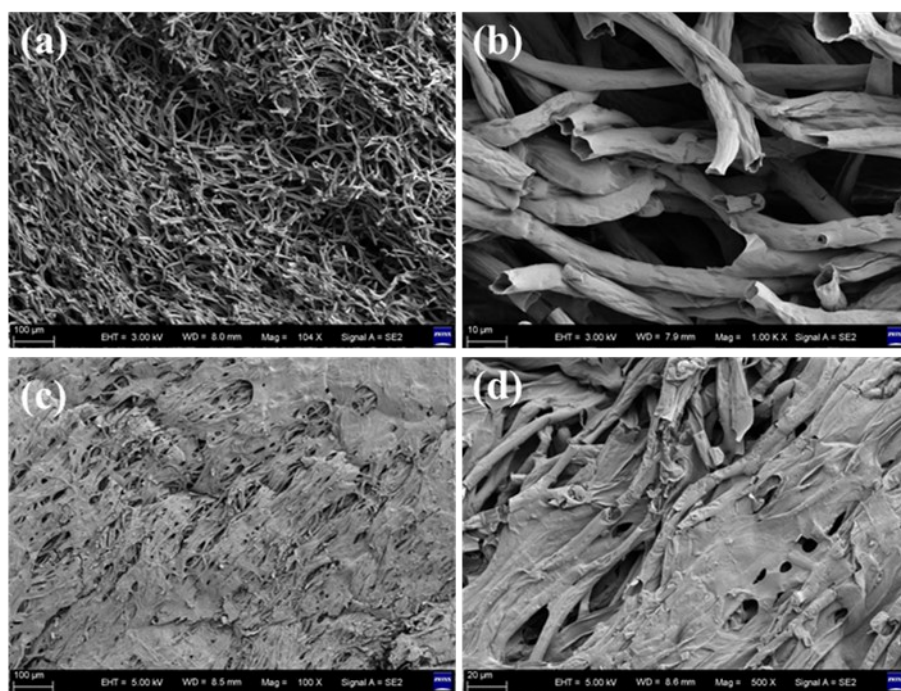

**Figure S2** (a), (b) SEM images of section plane perpendicular to the growth direction of PE. (c), (d) SEM images of section in PE growth direction.

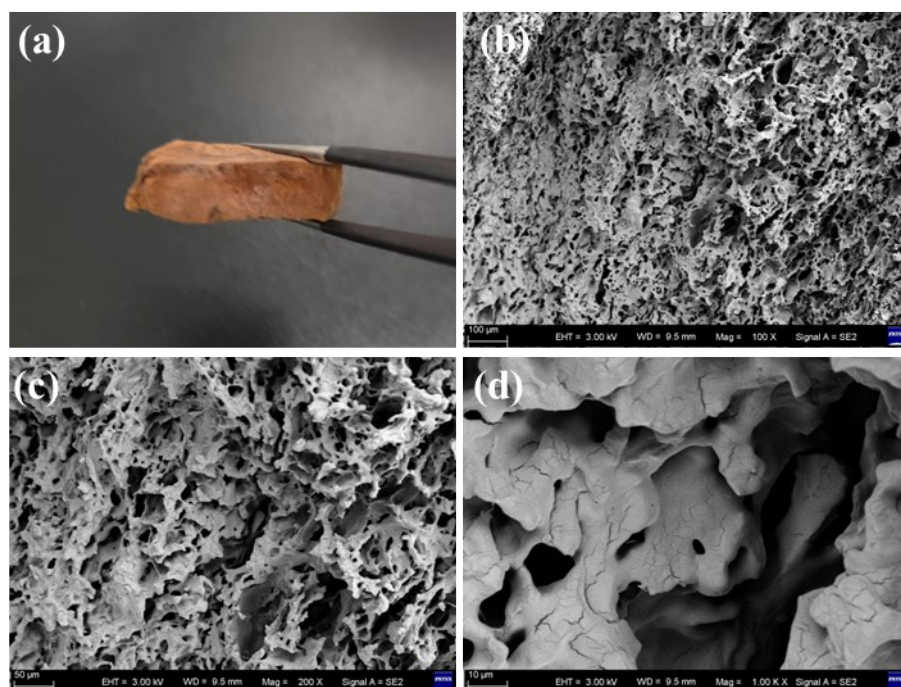

**Figure S3** (a) The digital photograph of PE-LS composite. (b-d) SEM images of the interior of PE-LS aerogel.

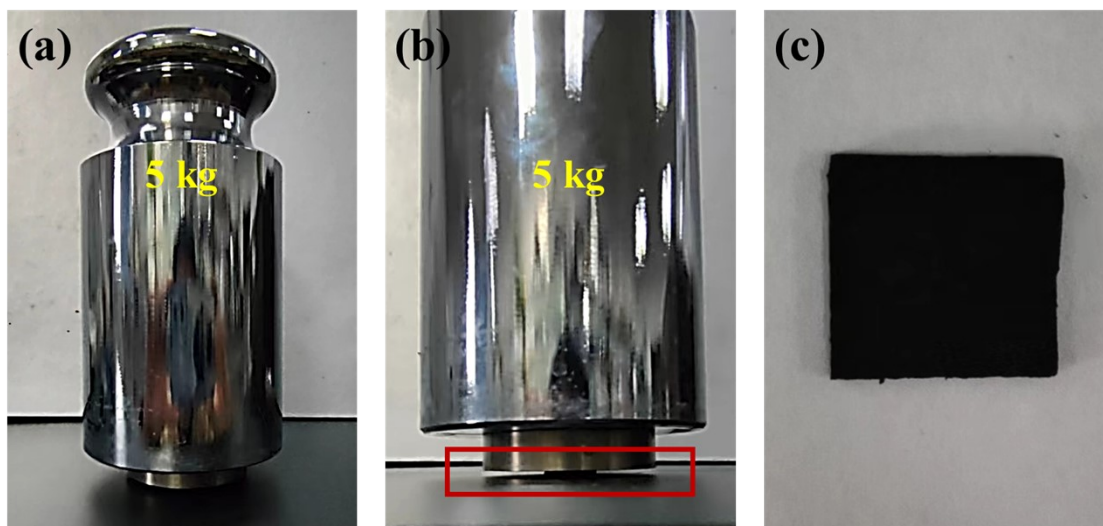

**Figure S4 (a-b)** C-PE-LS-KOH holds 5 kg of weight. **(c)** The morphology of C-PE-LS-KOH after being subjected to a 5 kg of weight.

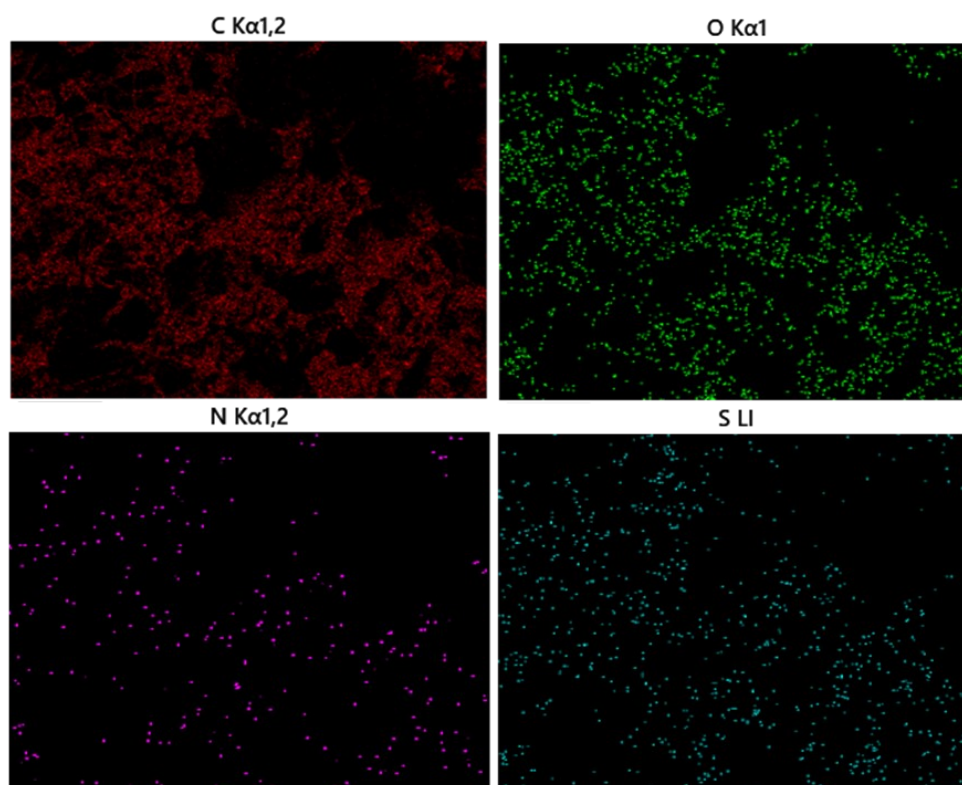

**Figure S5** EDS analysis of C-PE-LS-KOH.

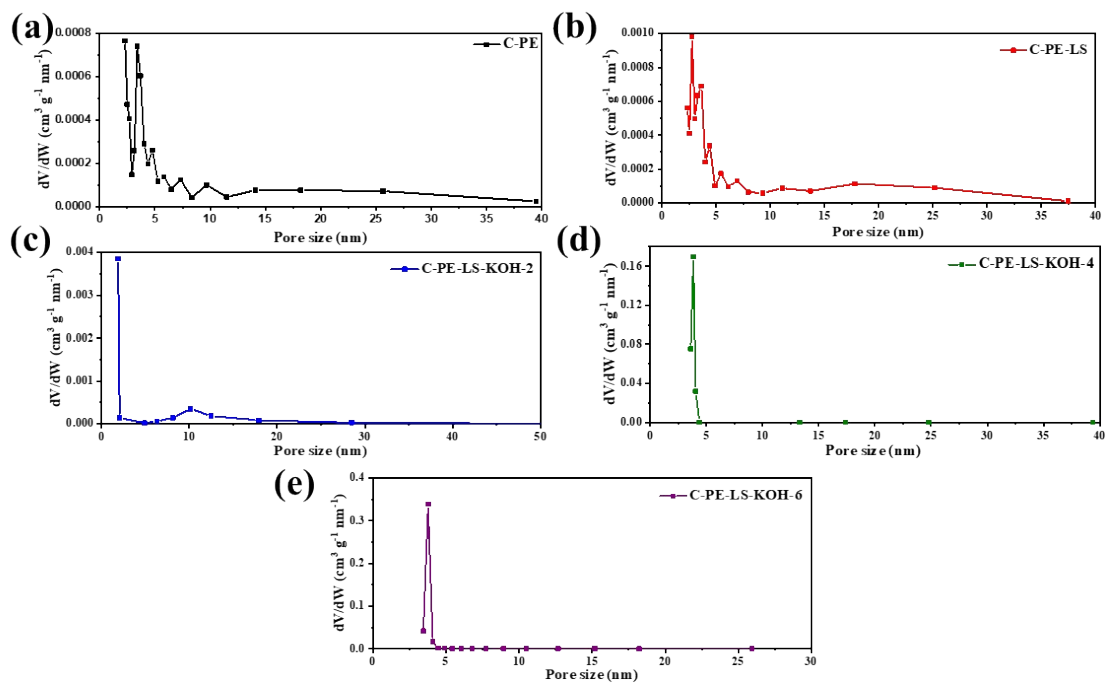

**Figure S6** The pore distribution of C-PE, C-PE-LS, C-PE-LS-KOH-2, C-PE-LS-KOH-4, and C-PE-LS-KOH-6.

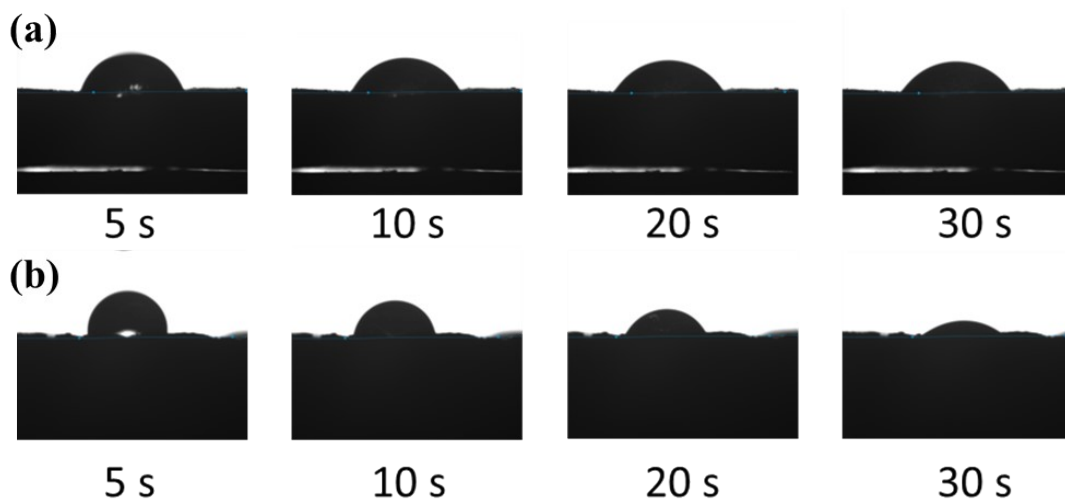

**Figure S7** Contact angle of C-PE (a) and C-PE-LS-KOH-4 (b).



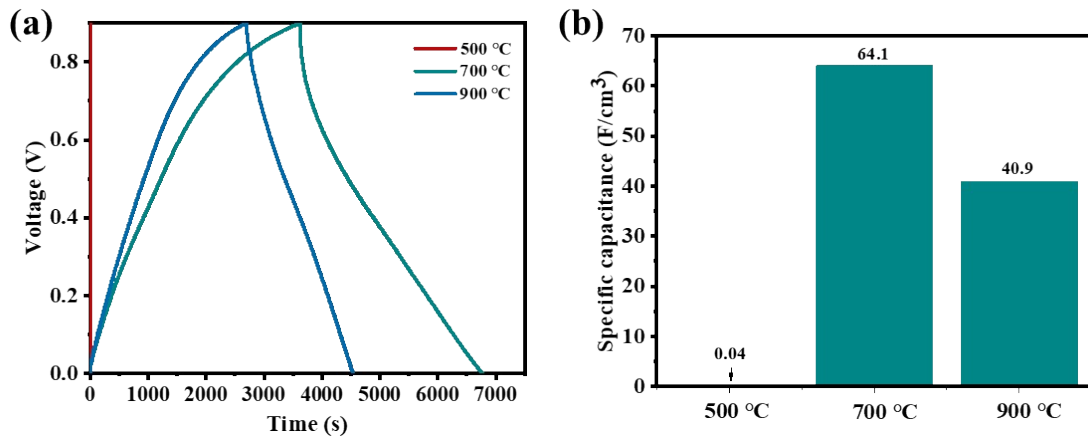

**Figure S8 (a)** The GCD curves of C-PE-LS-KOH-2 obtained under different temperatures of 500, 700, and 900 °C, and the corresponding areal capacitances **(b)**.

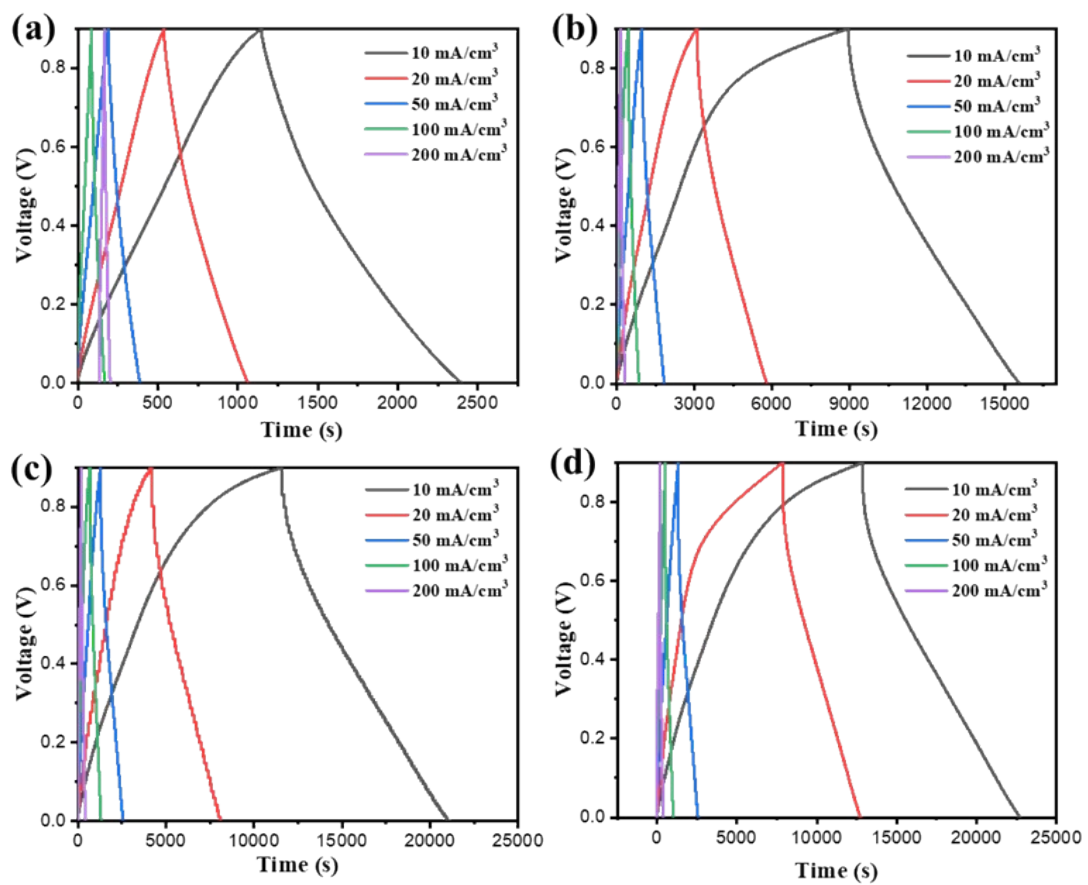

**Figure S9** The GCD curves at various current densities of C-PE-LS, C-PE-LS-KOH-2, C-PE-LS-KOH-4, C-PE-LS-KOH-6.



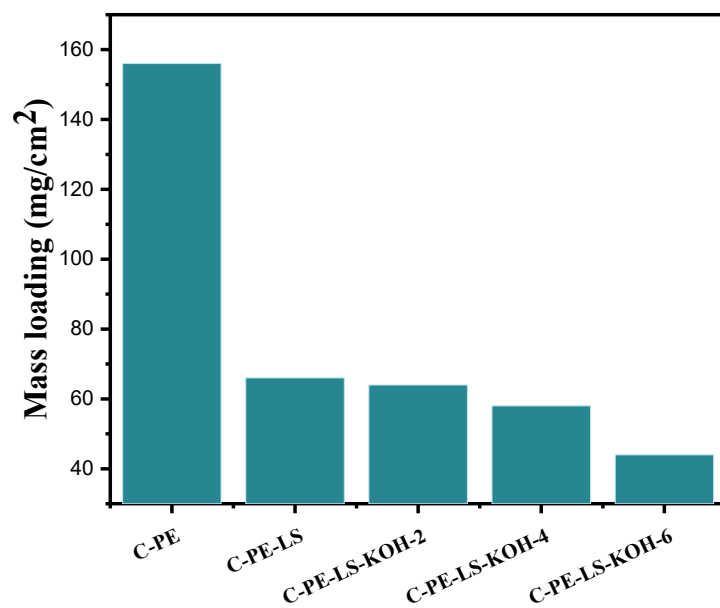

**Figure S10** The mass loading of C-PE, C-PE-LS, C-PE-LS-KOH-2, C-PE-LS-KOH-4, and C-PE-LS-KOH-6.

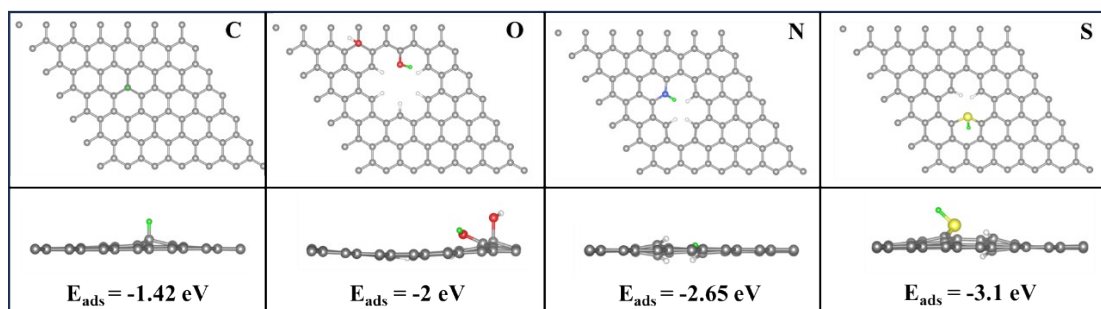

**Figure S11** Graphite-H, Graphite-O-H, Graphite -N-H, and Graphite-S-H optimized geometry adsorbed structures.

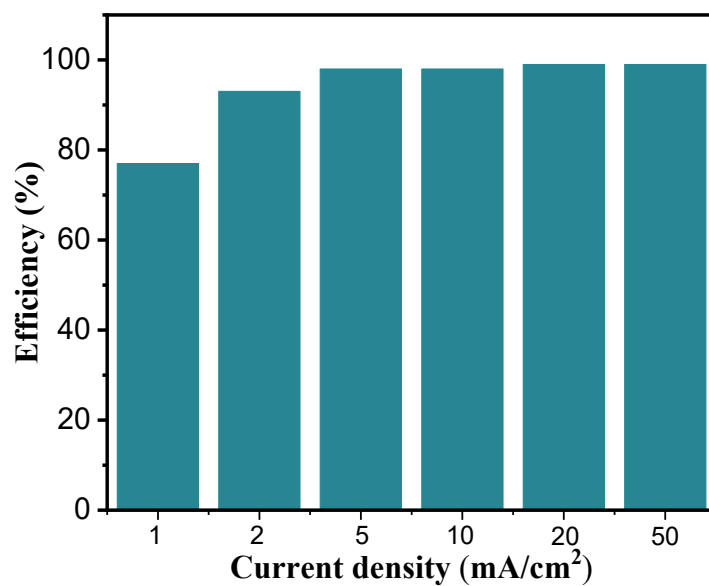

**Figure S12** The charging and discharging efficiency of this SSC device at various current densities.

**Table S1.** Resistance determined according to Nyquist plots for the as-synthesized samples

| Samples         | C-PE | C-PE-LS | C-PE-LS-KOH-2 | C-PE-LS-KOH-4 | C-PE-LS-KOH-6 |
|-----------------|------|---------|---------------|---------------|---------------|
| Rs( $\Omega$ )  | 1.60 | 1.33    | 1.76          | 1.79          | 1.90          |
| Rct( $\Omega$ ) | 6.98 | 0.89    | 1.00          | 1.76          | 2.39          |

**Table S2.** Comparison of areal capacitance, energy density, and thickness of our SSC devices with other reported other state-of-the-art supercapacitors.

| Ref.      | Areal capacitance<br>(F/cm <sup>3</sup> ) | Energy density<br>(mWh/cm <sup>3</sup> ) | Thickness<br>(mm) |
|-----------|-------------------------------------------|------------------------------------------|-------------------|
| This work | 12.80                                     | 2.56                                     | 4                 |
| 8         | 3.94                                      | 0.55                                     | 3                 |
| 9         | 0.85                                      | 0.94                                     | 4                 |
| 10        | 18.74                                     | 1.56                                     | 8                 |
| 11        | 6.21                                      | 1.86                                     | 2                 |
| 12        | 1.36                                      | 0.3                                      | 6                 |
| 13        | 4.70                                      | 0.94                                     | 1.6               |
| 14        | 1.5                                       | 0.21                                     | 1.6               |
| 15        | 3.62                                      | 0.50                                     | 1.6               |
| 16        | 3.29                                      | 0.89                                     | 4                 |
| 17        | 0.64                                      | 0.05                                     | 2                 |

[1] Kresse, G.; Furthmüller, J. Efficiency of Ab-Initio Total Energy Calculations for Metals and Semiconductors Using a Plane-Wave Basis Set. *Comput. Mater. Sci.* 1996, 6, 15–50.

[2] Kresse, G.; Furthmüller, J. Efficient Iterative Schemes for Ab Initio Total-Energy Calculations Using a Plane-Wave Basis Set. *Phys. Rev. B* 1996, 54, 11169–11186.

[3] Perdew, J. P.; Burke, K.; Ernzerhof, M. Generalized Gradient Approximation Made Simple. *Phys. Rev. Lett.* 1996, 77, 3865–3868.

[4] Kresse, G.; Joubert, D. From Ultrasoft Pseudopotentials to the Projector Augmented-Wave Method. *Phys. Rev. B* 1999, 59, 1758-1775.

[5] Blöchl, P. E. Projector Augmented-Wave Method. *Phys. Rev. B* 1994, 50, 17953-17979.

[6] S. Grimme, J. Antony, S. Ehrlich, and S. Krieg, *J. Chem. Phys.* 2010 , 132, 154104.

[7] S. Grimme, S. Ehrlich, and L. Goerigk, *J. Comp. Chem.* 2011 , 32, 1456.

- [8] Zhang, W.; Li, M.; Zhong, L.; Huang, J.; Liu, M., A family of MOFs@ Wood-Derived hierarchical porous composites as freestanding thick electrodes of solid supercapacitors with enhanced areal capacitances and energy densities. *Materials Today Energy* 2022, 24, 100951.
- [9] Yao, B.; Chandrasekaran, S.; Zhang, H.; Ma, A.; Kang, J.; Zhang, L.; Lu, X.; Qian, F.; Zhu, C.; Duoss, E. B., 3D-printed structure boosts the kinetics and intrinsic capacitance of pseudocapacitive graphene aerogels. *Advanced materials* 2020, 32 (8), 1906652.
- [10] Yao, B.; Chandrasekaran, S.; Zhang, J.; Xiao, W.; Qian, F.; Zhu, C.; Duoss, E. B.; Spadaccini, C. M.; Worsley, M. A.; Li, Y., Efficient 3D printed pseudocapacitive electrodes with ultrahigh MnO<sub>2</sub> loading. *Joule* 2019, 3 (2), 459-470.
- [11] Yan, B.; Feng, L.; Zheng, J.; Zhang, Q.; Jiang, S.; Zhang, C.; Ding, Y.; Han, J.; Chen, W.; He, S., High performance supercapacitors based on wood-derived thick carbon electrodes synthesized via green activation process. *Inorganic Chemistry Frontiers* 2022, 9 (23), 6108-6123.
- [12] Liu, K.; Mo, R.; Dong, W.; Zhao, W.; Huang, F., Nature-derived, structure and function integrated ultra-thick carbon electrode for high-performance supercapacitors. *Journal of Materials Chemistry A* 2020, 8 (38), 20072-20081.
- [13] Wang, F.; Cheong, J. Y.; He, Q.; Duan, G.; He, S.; Zhang, L.; Zhao, Y.; Kim, I.-D.; Jiang, S., Phosphorus-doped thick carbon electrode for high-energy density and long-life supercapacitors. *Chemical Engineering Journal* 2021, 414, 128767.
- [14] Wang, X.; Yang, C.; Li, J.; Chen, X. a.; Yang, K.; Yu, X.; Lin, D.; Zhang, Q.; Wang, S.; Wang, J., Insights of heteroatoms doping-enhanced bifunctionalities on carbon based energy storage and conversion. *Advanced Functional Materials* 2021, 31 (11), 2009109.
- [15] Chen, L.; Wang, F.; Tian, Z.; Guo, H.; Cai, C.; Wu, Q.; Du, H.; Liu, K.; Hao, Z.; He, S., Wood-Derived High-Mass-Loading MnO<sub>2</sub> Composite Carbon Electrode Enabling High Energy Density and High-Rate Supercapacitor. *Small* 2022, 18 (25), 2201307.
- [16] Xue, J.; Gao, L.; Hu, X.; Cao, K.; Zhou, W.; Wang, W.; Lu, Y., Stereolithographic 3D printing-based hierarchically cellular lattices for high-performance quasi-solid supercapacitor. *Nano-Micro Letters* 2019, 11, 1-13.
- [17] Tang, X.; Zhou, H.; Cai, Z.; Cheng, D.; He, P.; Xie, P.; Zhang, D.; Fan, T., Generalized 3D printing of graphene-based mixed-dimensional hybrid aerogels. *ACS nano* 2018, 12 (4), 3502-3511.
